# Supplementary material for: ‘AI-Learner Partnership:’: Psychological Mechanisms and Developmental Trajectories of EFL Learners’ Writing Agency in GenAI-Assisted Courses
Source: Research Square preprint supplement (doi:10.21203/rs.3.rs-7972095/v1), 2025-11-18
Supplement: Supplementary file 1 [file fd7a524f3f1bf0e1f9352b20.docx]

***Supplementary file***

**‘*AI-Learner Partnership*:’: Psychological Mechanisms and Developmental Trajectories of EFL Learners’ Writing Agency in GenAI-Assisted Courses**

**Semi-Structured Interview Protocol**

**Interview Duration:** 30-45 minutes
**Administration:** Individual sessions conducted at three time points (Week 5, Week 10, Week 16)

**Part I: Background and Initial Experiences**

**1. Pre-Course Writing Profile**

- Could you describe your academic writing experiences in English prior to this course?
- Probe: What specific challenges did you encounter in L2 academic writing?
- Probe: How would you characterize your writing self-efficacy before the course?

**2. Technology and AI Familiarity**

- What was your prior exposure to AI tools for writing or learning purposes?
- Probe: If any, how did you previously interact with these technologies?
- Probe: What expectations or apprehensions did you hold regarding AI in academic writing?

**Part II: GenAI Interaction Patterns and Strategic Use**

**3. Writing Process Navigation**

- Walk me through your current writing process when incorporating GenAI tools.
- Probe: At which specific stages do you engage with AI assistance?
- Probe: How do you determine the appropriate level of AI involvement for different tasks?

**4. Tool Relationship Conceptualization**

- How would you characterize your working relationship with GenAI during writing tasks?
- Probe: Has this conceptualization evolved throughout the course? In what ways?
- Probe: Do you perceive the AI as an instrument, collaborator, mentor, or something else entirely?

**5. Strategic Decision-Making**

- Describe your decision-making process regarding when and how to utilize AI assistance.
- Probe: What contextual factors influence these strategic choices?
- Probe: How has your strategic approach become more sophisticated over time?

**6. Content Negotiation Processes**

- Can you recount a specific instance where you negotiated between your ideas and AI suggestions?
- Probe: What criteria guided your acceptance or rejection of AI-generated content?
- Probe: How do you maintain conceptual coherence while integrating AI contributions?

**Part III: Agency Development and Authorial Identity**

**7. Authorship and Ownership Perceptions**

- How has your sense of textual ownership evolved when working collaboratively with AI?
- Probe: Under what conditions do you feel the text authentically represents your authorship?
- Probe: How do you negotiate authorial voice while incorporating AI assistance?

**8. Critical Evaluation and Resistance**

- Describe an occasion where you critically challenged or rejected AI recommendations.
- Probe: What metacognitive processes led to this critical stance?
- Probe: How did this experience influence your subsequent AI interactions?

**9. Evaluative Competence Development**

- What framework do you now employ to assess AI-generated content quality and appropriateness?
- Probe: How have your evaluative criteria become more refined throughout the course?
- Probe: What linguistic or rhetorical features do you particularly scrutinize?

**10. Self-Efficacy and Confidence Trajectories**

- In what specific ways has GenAI engagement affected your writing self-efficacy?
- Probe: Can you identify concrete instances of confidence enhancement or diminishment?
- Probe: How do you balance AI reliance with autonomous skill development?

**Part IV: Psychological and Affective Dimensions**

**11. Emotional Landscape of AI-Mediated Writing**

- What emotional responses characterize your GenAI-assisted writing experiences?
- Probe: How do these affective states differ from traditional unassisted writing?
- Probe: Have your emotional responses to AI collaboration evolved over time?

**12. Motivational Dynamics and Engagement**

- How has AI integration influenced your intrinsic motivation and engagement with academic writing?
- Probe: What aspects of AI collaboration enhance or diminish your writing enjoyment?
- Probe: How do you maintain authentic investment in your writing development?

**13. Cognitive Load and Mental Model Evolution**

- How has working with GenAI influenced your understanding of writing as a cognitive process?
- Probe: What new insights about composition and rhetoric have emerged?
- Probe: How has AI collaboration affected your approach to complex writing problems?

**Part V: Identity Transformation and Future Orientation**

**14. Writer Identity Reconceptualization**

- How would you characterize your current writer identity compared to pre-course conceptualizations?
- Probe: What dimensions of your writerly self have undergone transformation?
- Probe: What core aspects of your writing identity have remained stable?

**15. Competence Development and Growth Narratives**

- How do you perceive your growth trajectory as an academic writer throughout this AI-mediated course?
- Probe: Which specific competencies have developed through AI collaboration?
- Probe: How do you distinguish between AI-facilitated improvement and personal skill acquisition?

**16. Agency Manifestation and Control**

- In what ways do you now exercise agency within human-AI collaborative writing contexts?
- Probe: How has your sense of control over the writing process evolved?
- Probe: What strategies do you employ to maintain agency while leveraging AI capabilities?

**17. Future Integration and Professional Development**

- How do you envision incorporating GenAI in your future academic and professional writing practices?
- Probe: What principles or boundaries will guide your continued AI use?
- Probe: How will you continue developing autonomous writing competence alongside AI tools?
